# Supplementary material for: Neuroglobin plays as tumor suppressor by disrupting the stability of GPR35 in colorectal cancer
Source: PubMed Central journal article supplement (PMC10067258; doi:10.1186/s13148-023-01472-2), 2023-04-01

# NGB-CRC gel/blots

## Figure 1D. RT-PCR

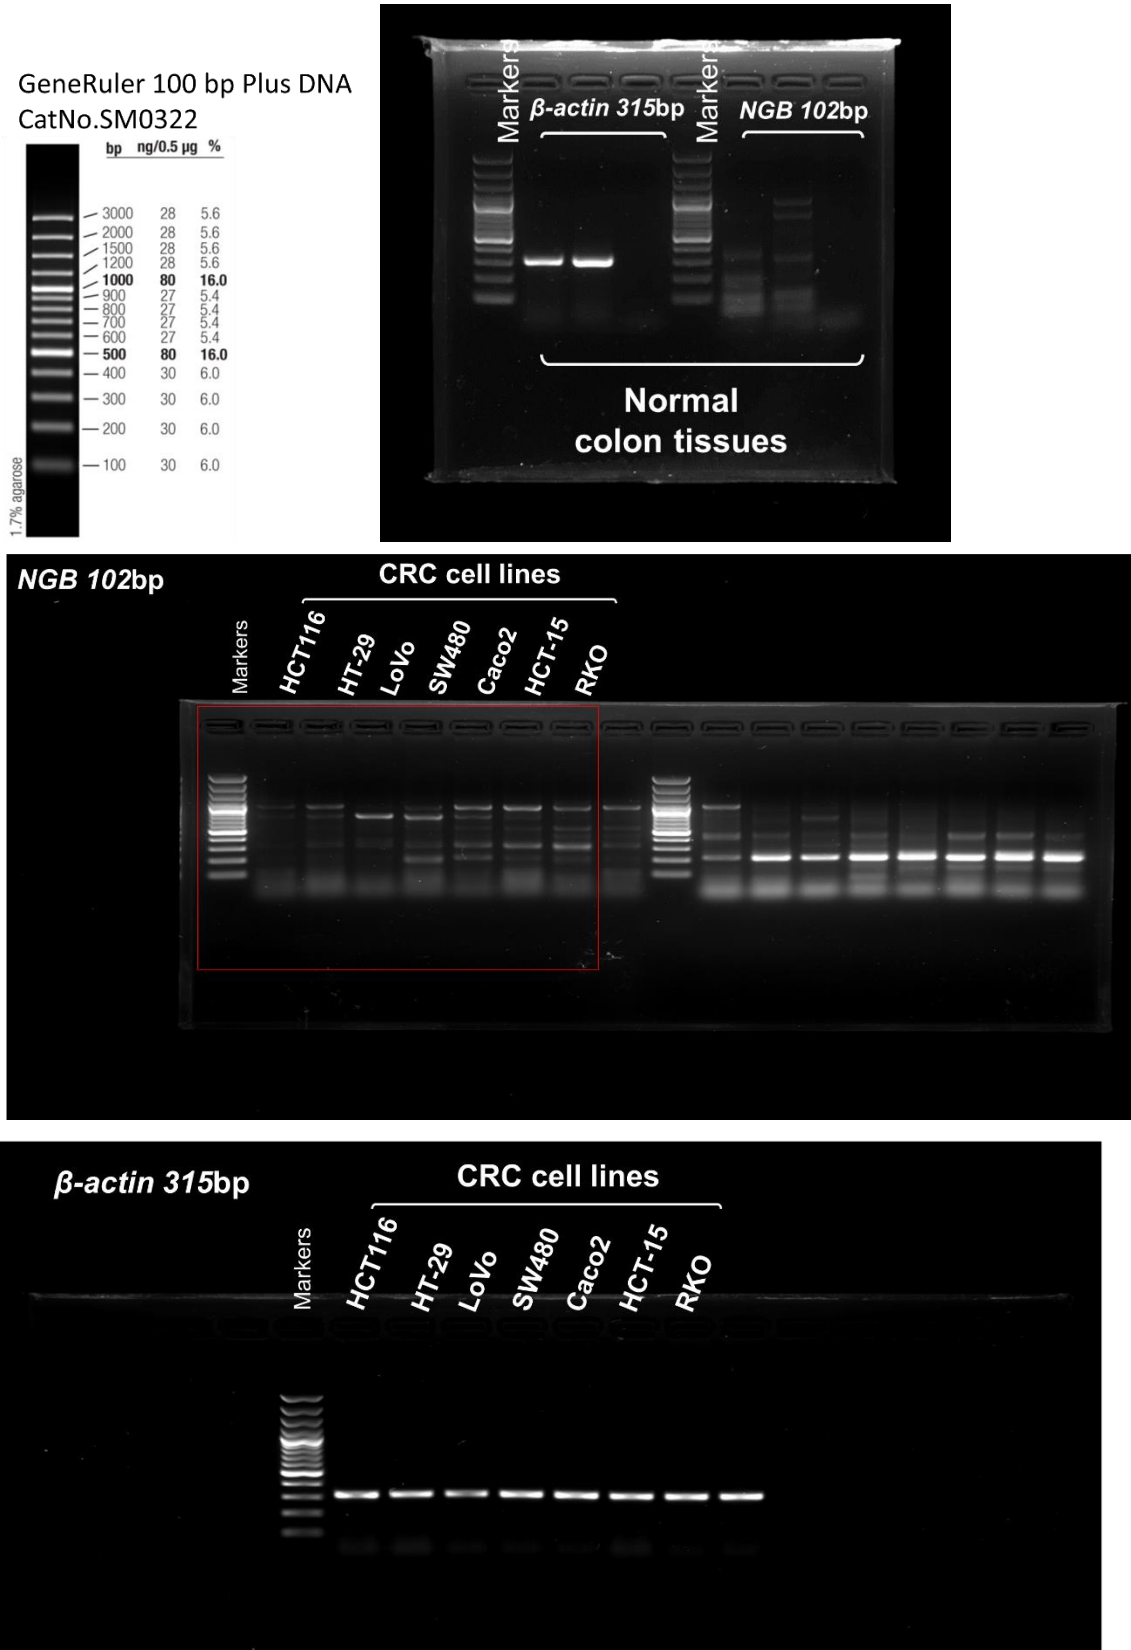

**Figure 1D. WB**

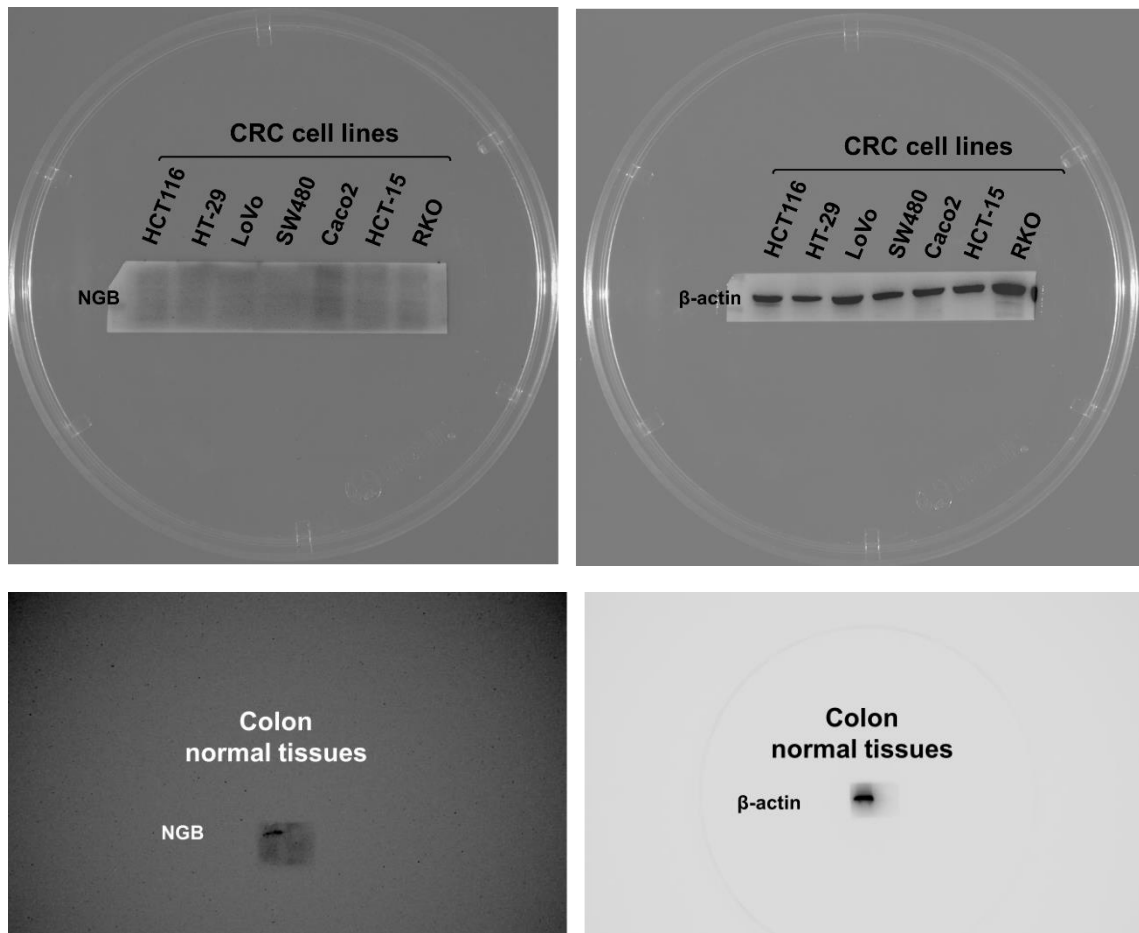

Figure 2B. MSP

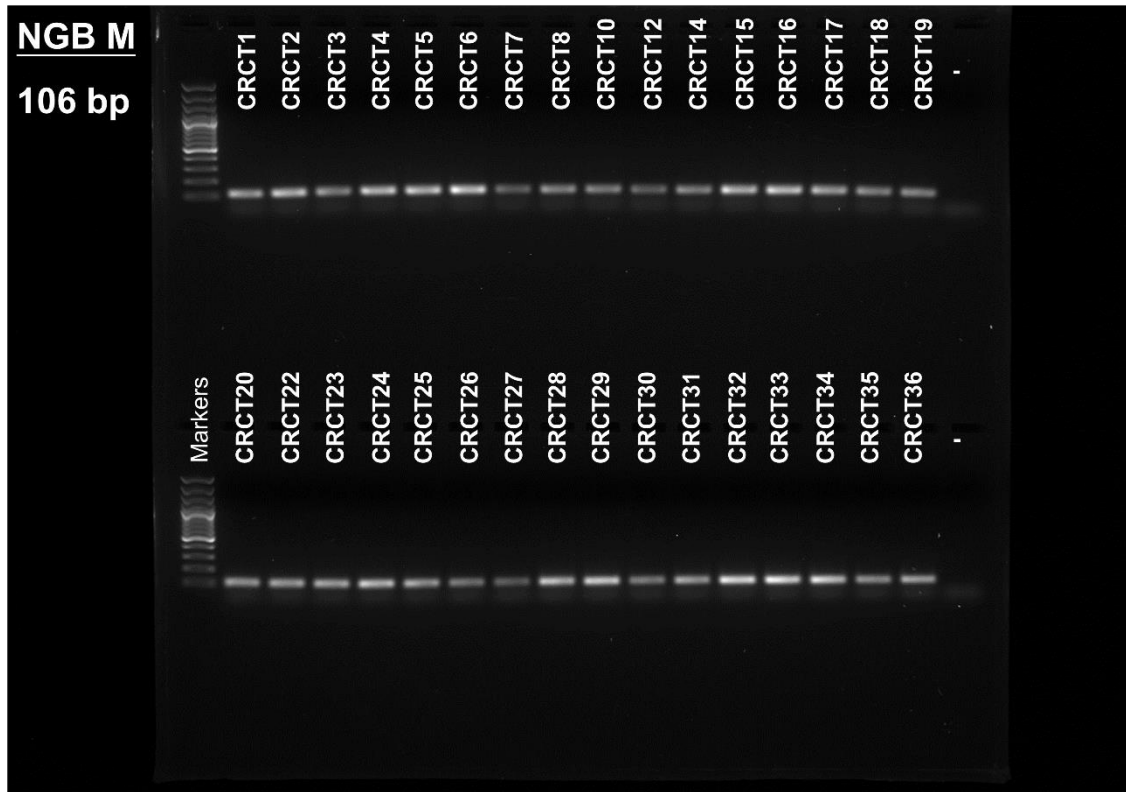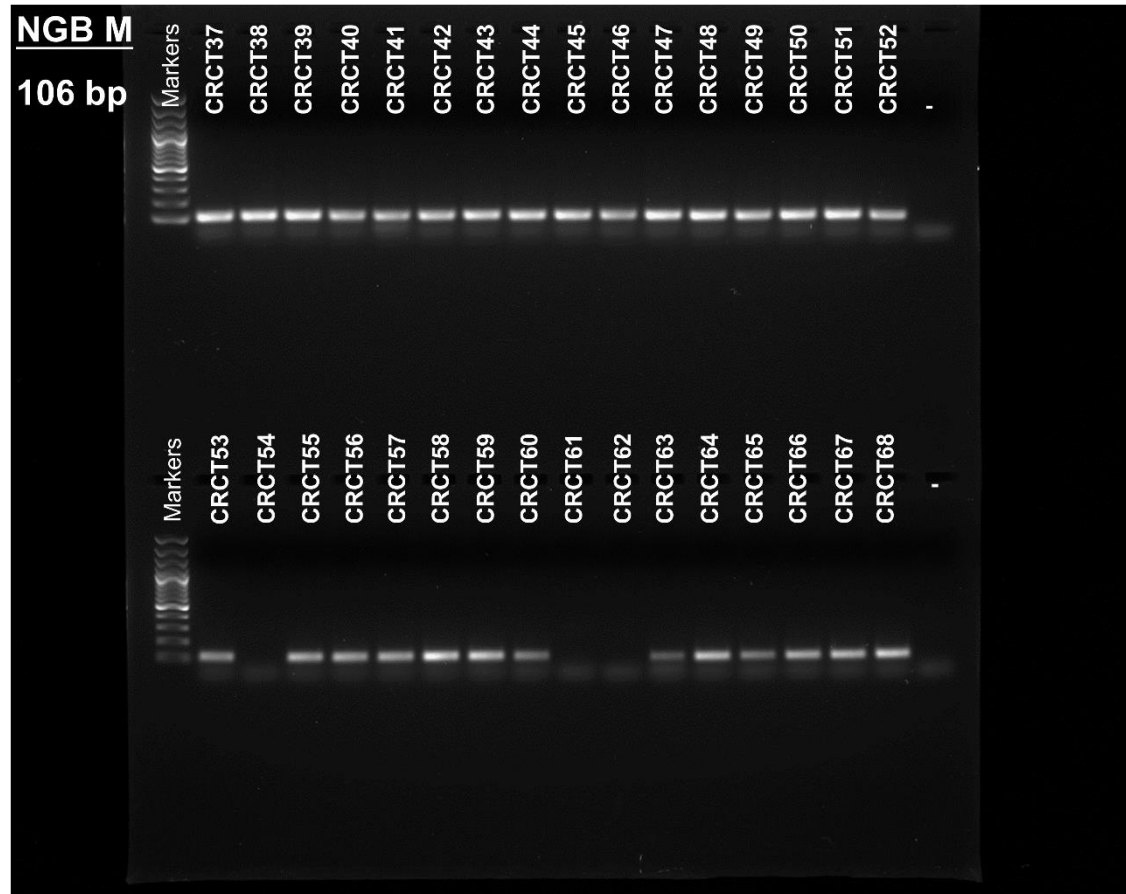

Figure 2B. MSP

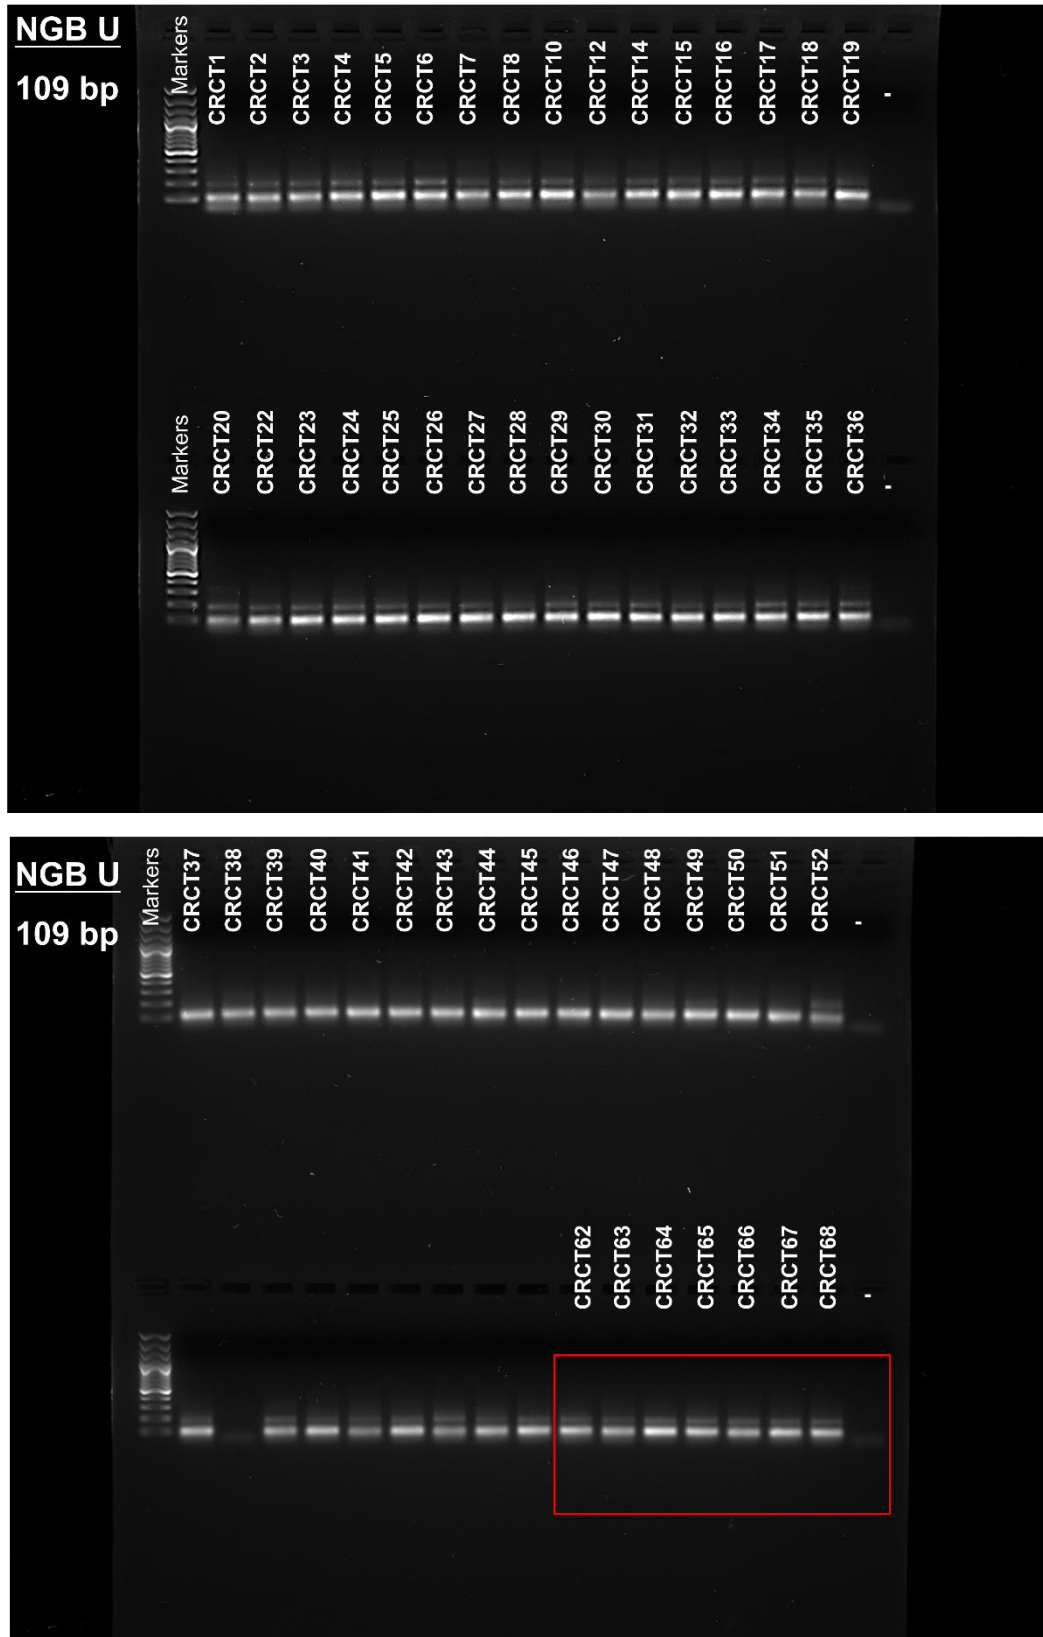

**Figure 2B. MSP**

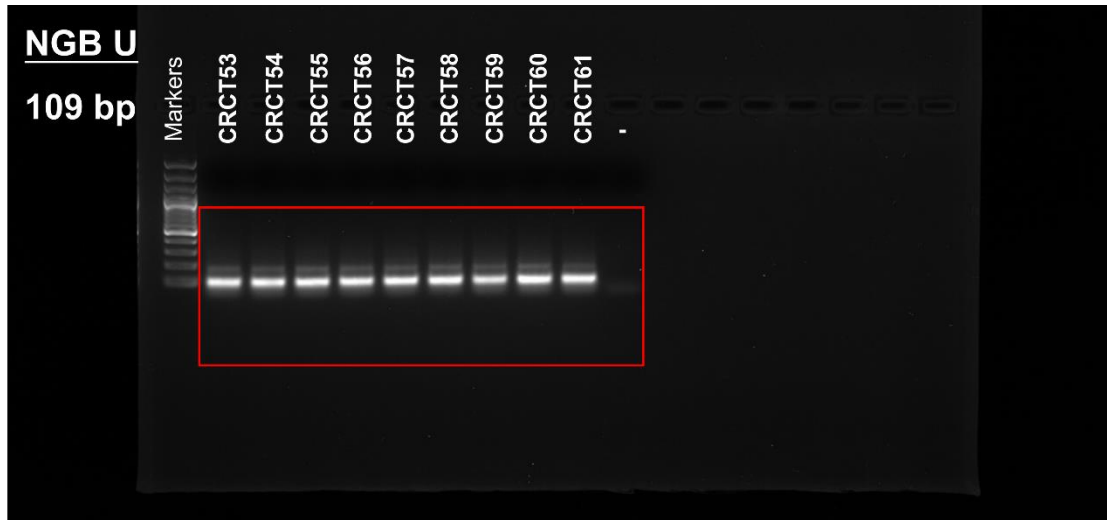

**Figure 3A**

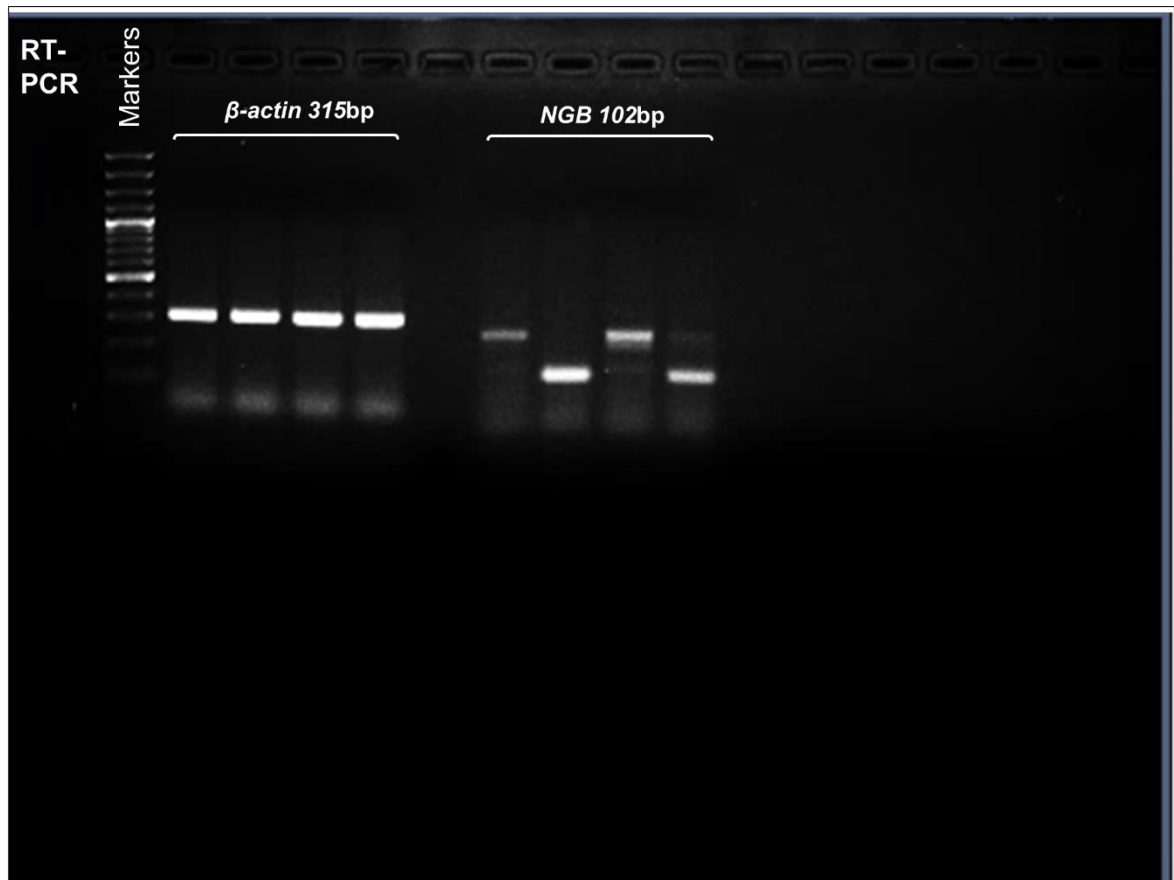

**NGB**

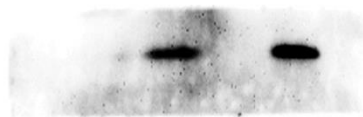

**GAPDH**

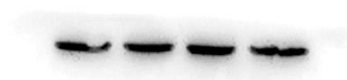

**Figure 3F**

Upper: HCT116, Bottom: Caco2

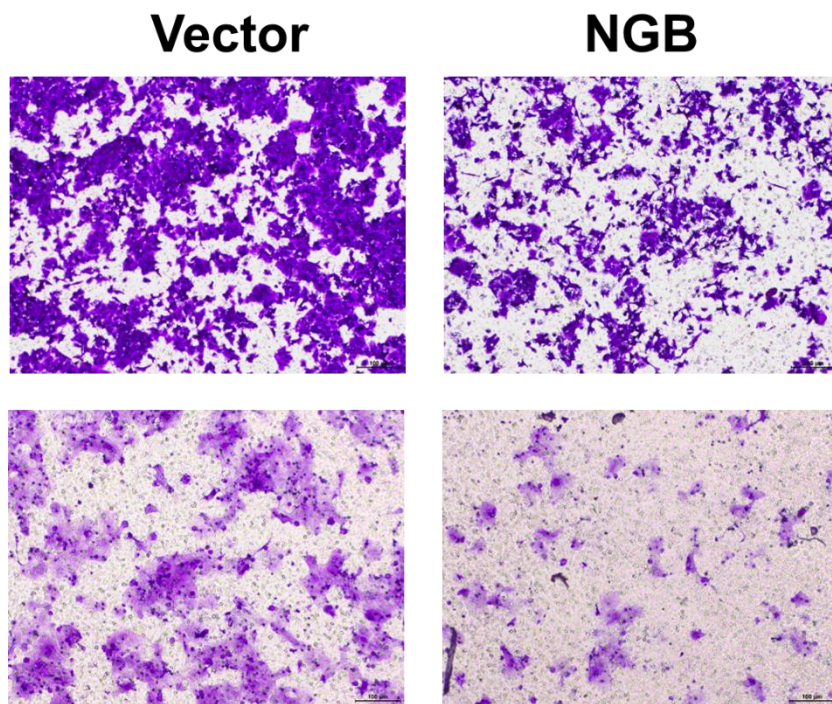

**Figure 3G**

Vector

NGB

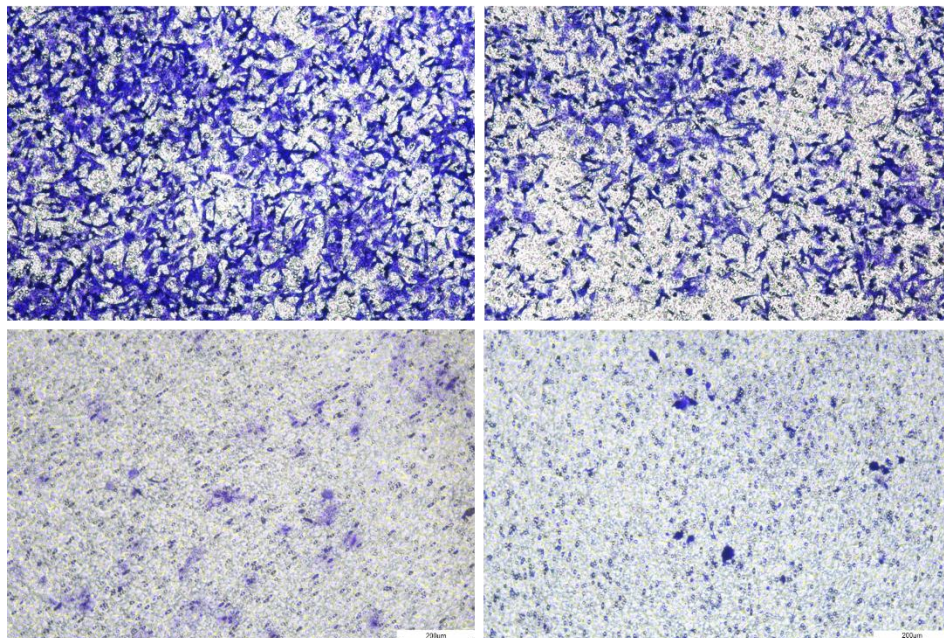

**Figure 4B**

**Upper: HCT116 conditional medium,**

**Bottom: Caco2 conditional medium,**

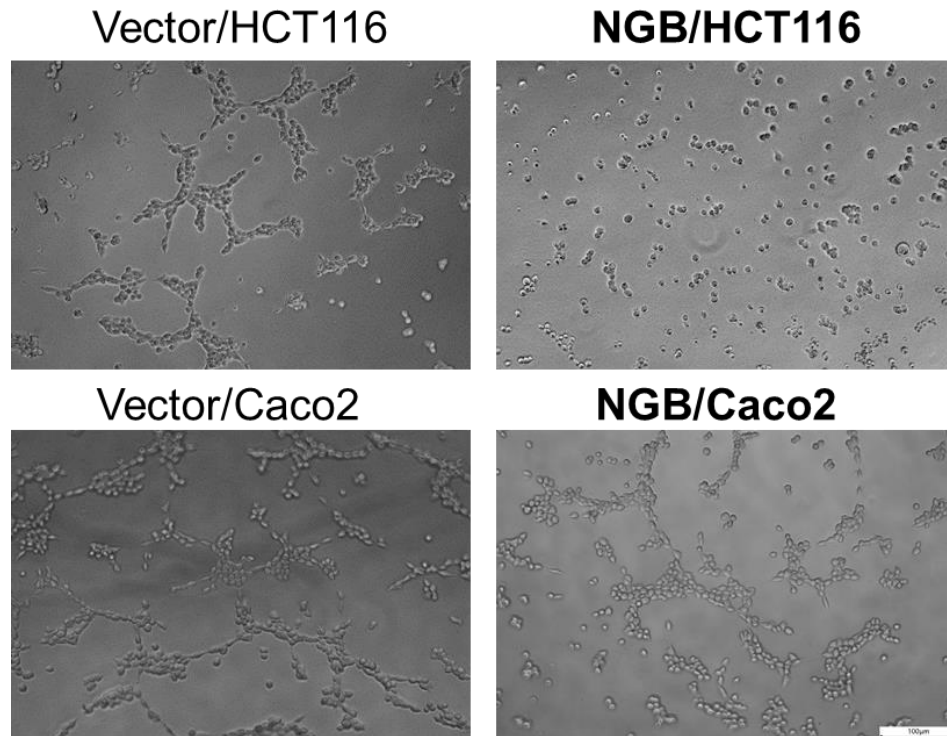

**Figure 4C**

**Upper: HCT116, Bottom: Caco2**

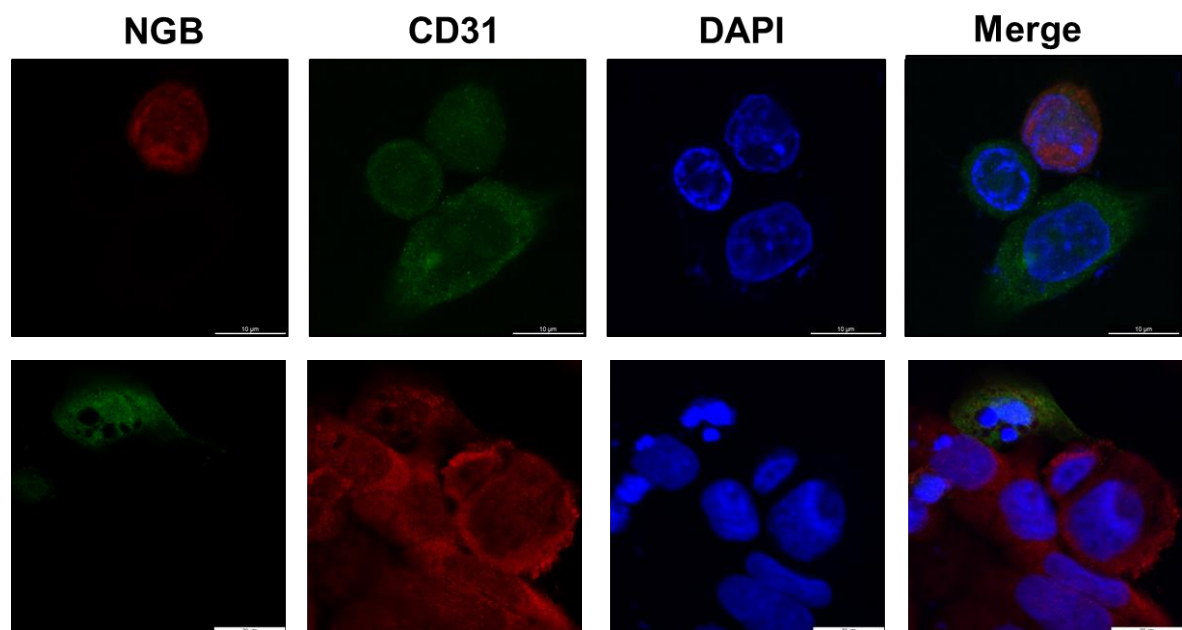



**Figure 4D WB**

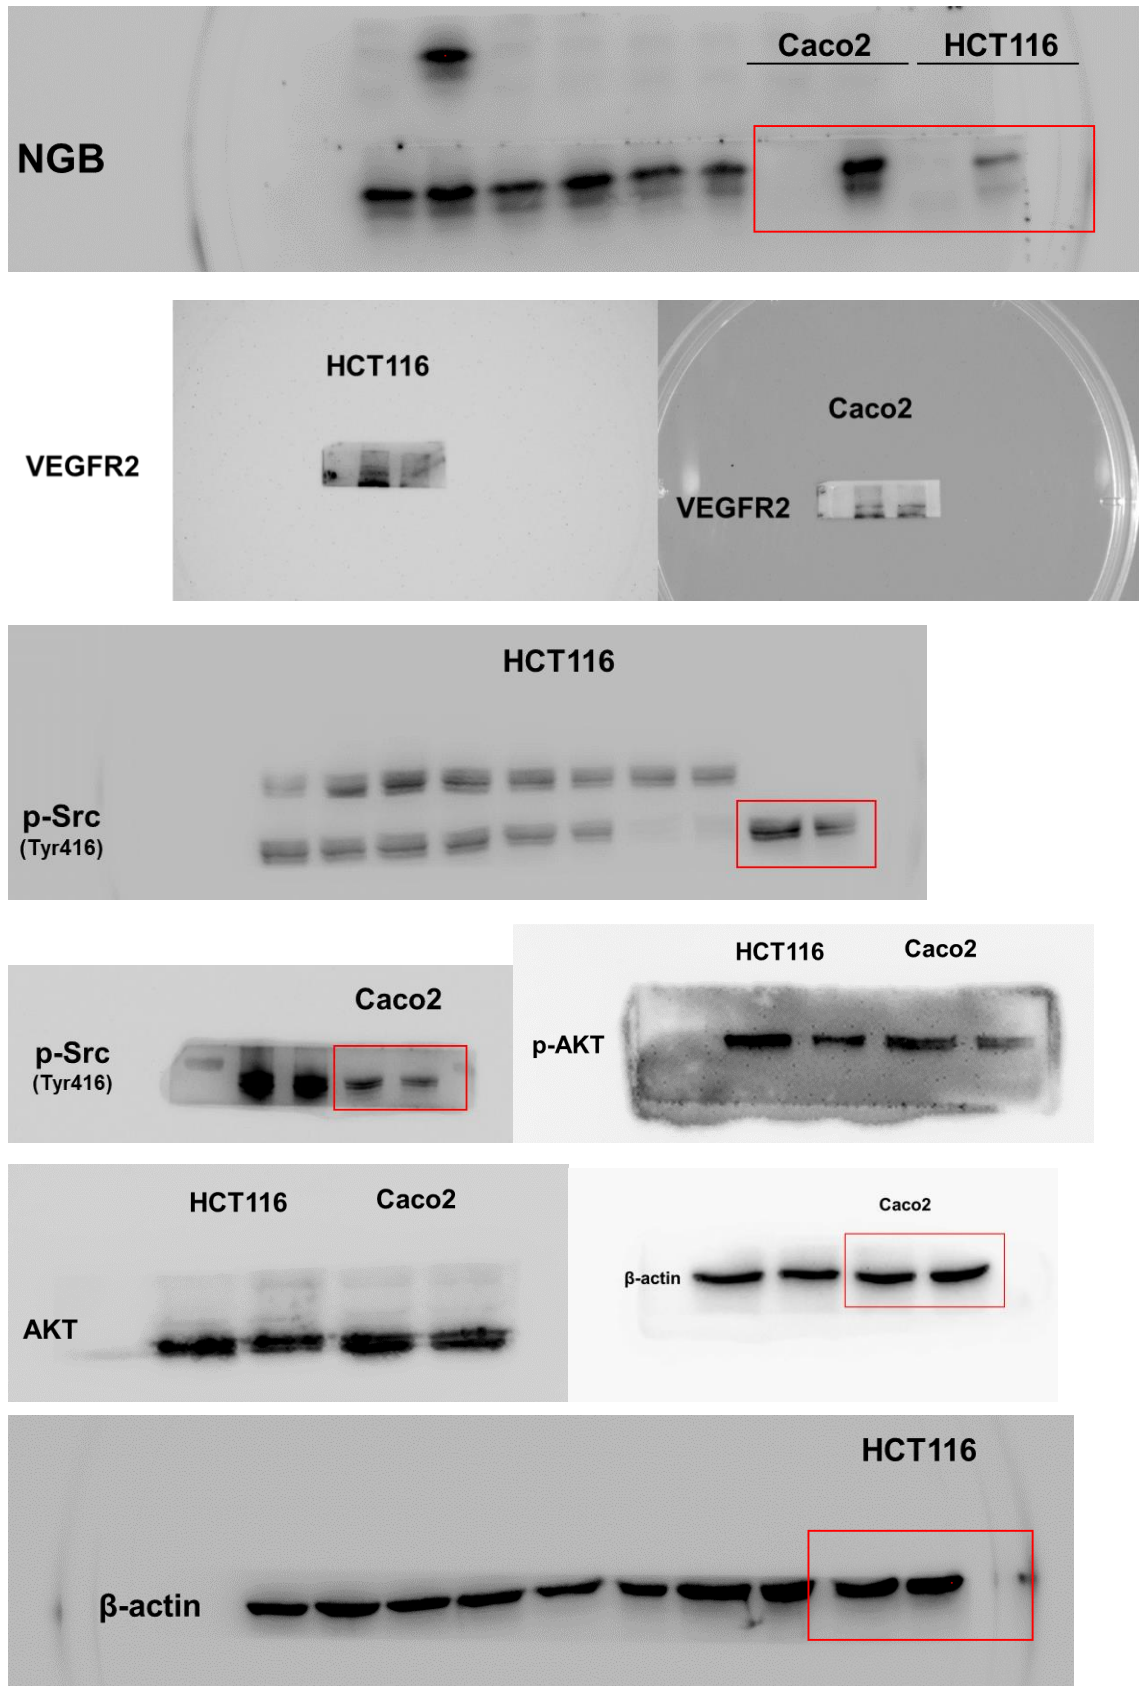

**Figure 4D. WES**

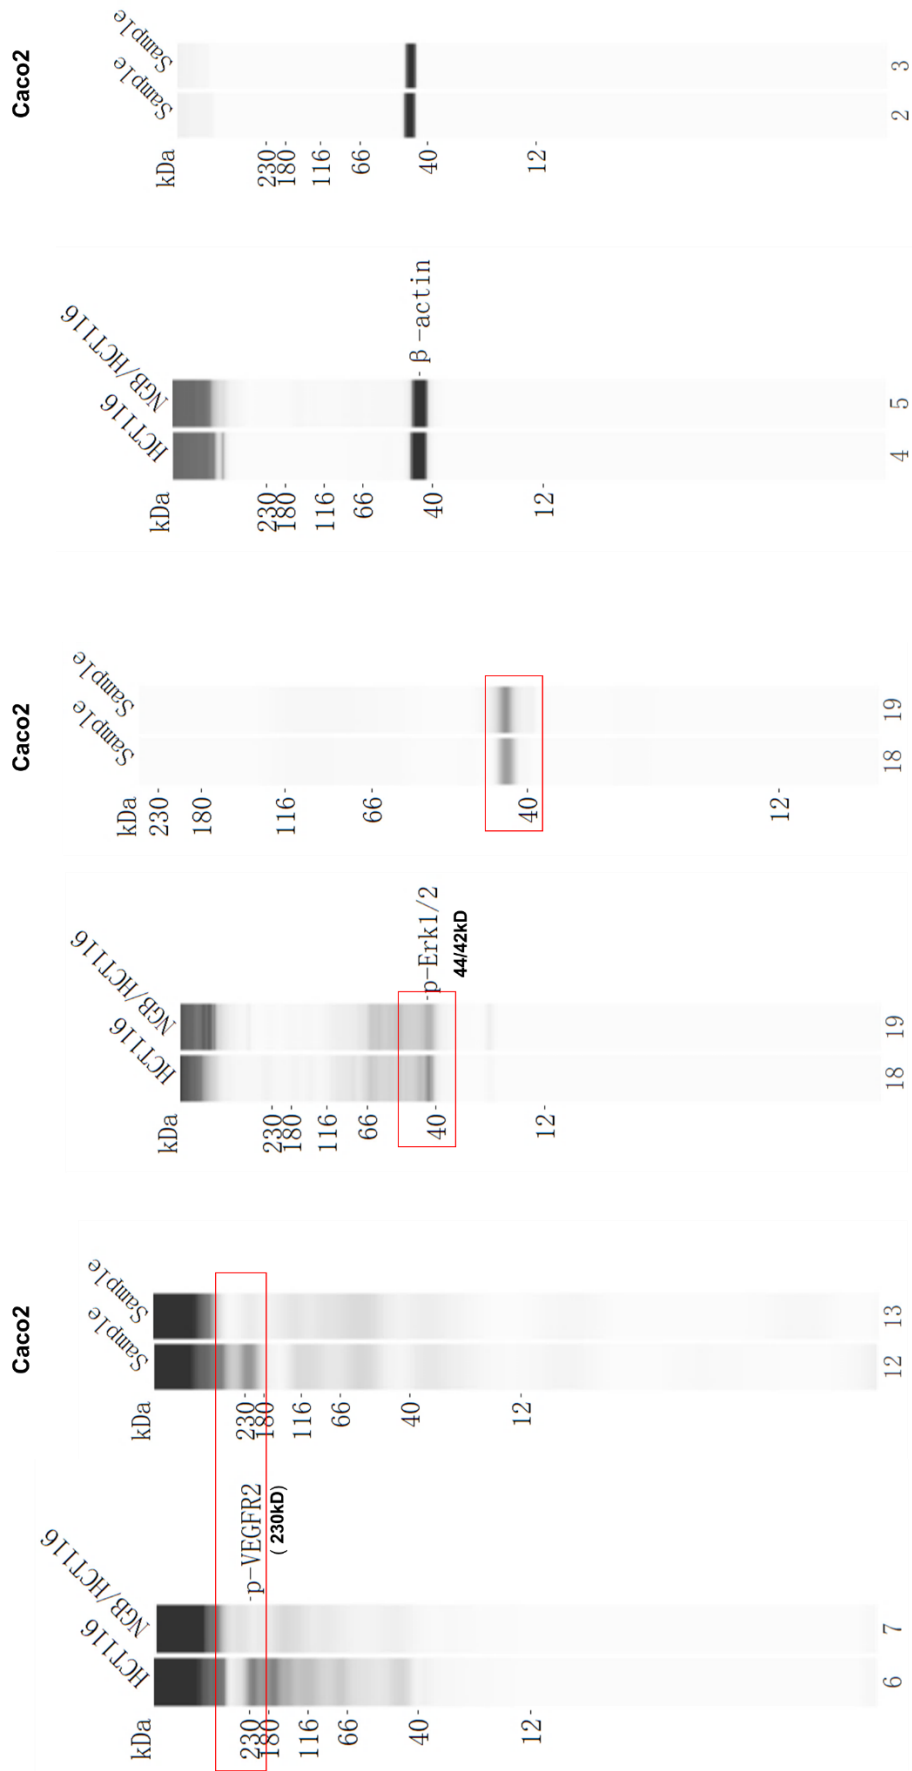

**Figure 4E**

**Upper: HCT116, Bottom: Caco2**

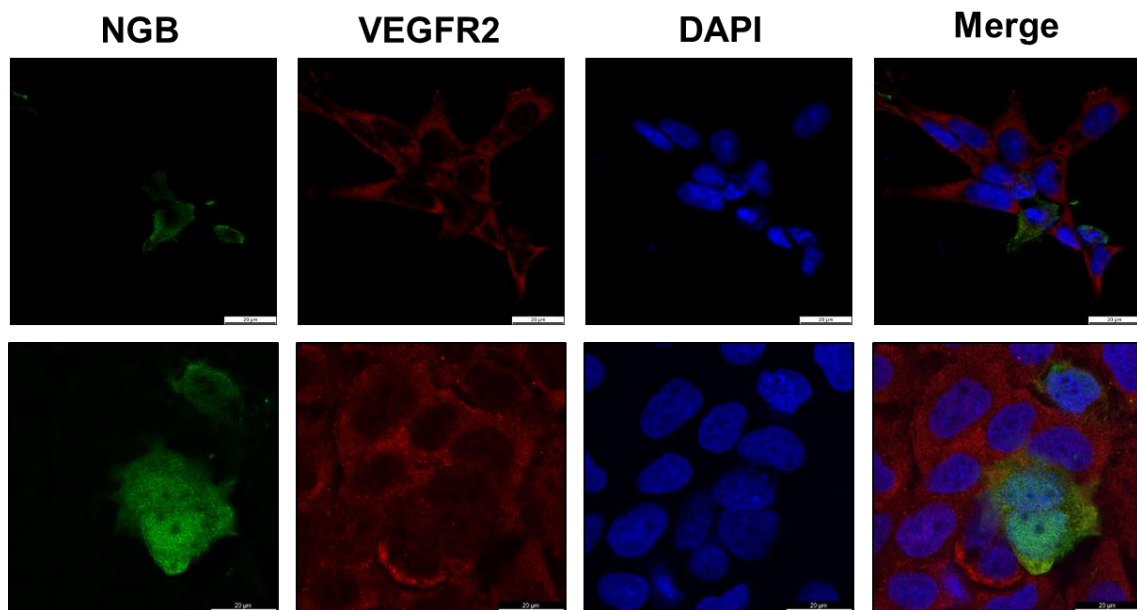

**Figure 5B WB**

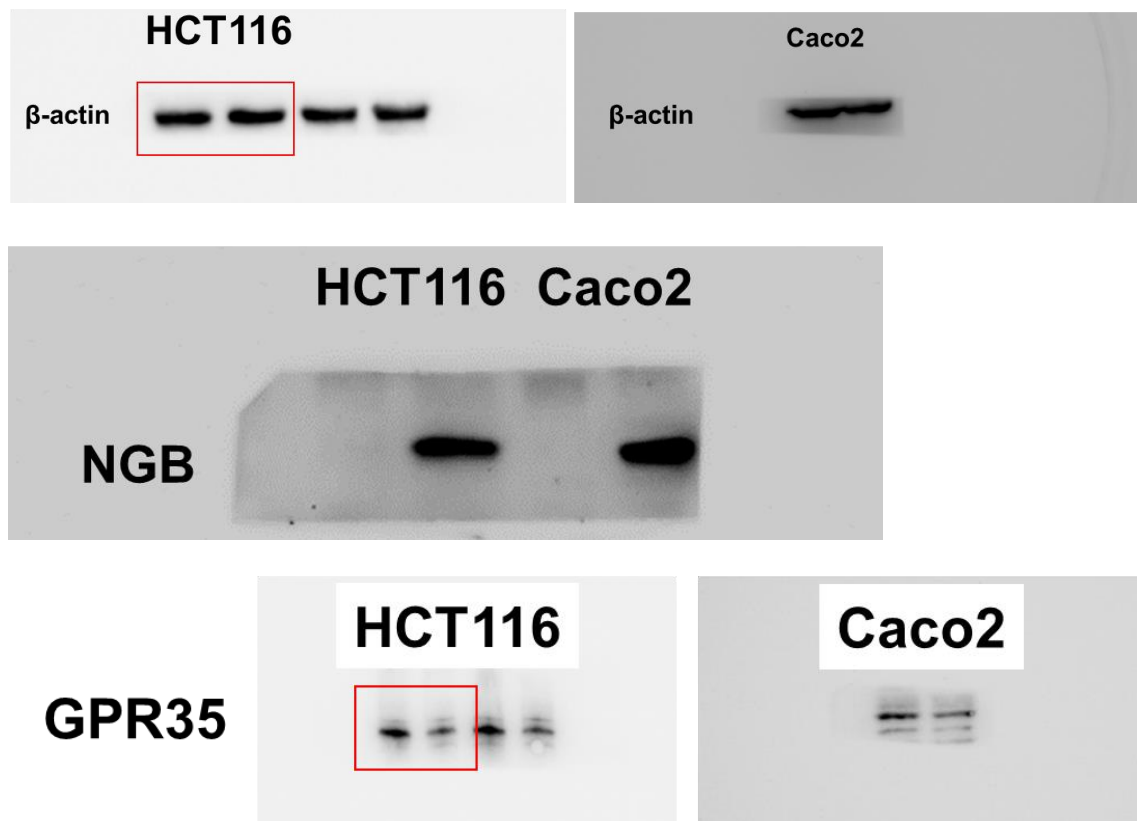

Figure 5C WB

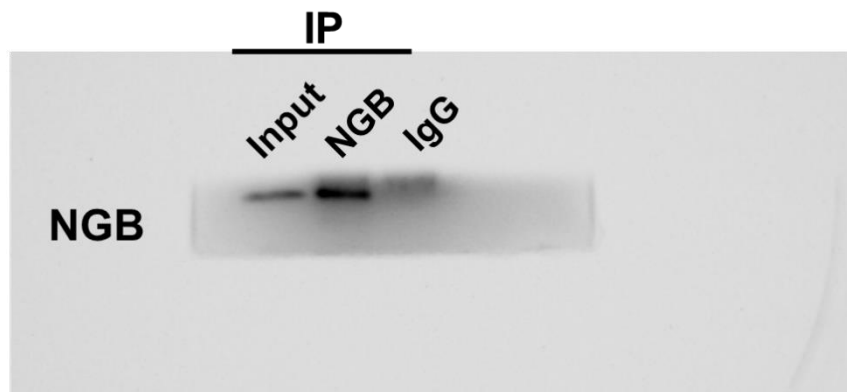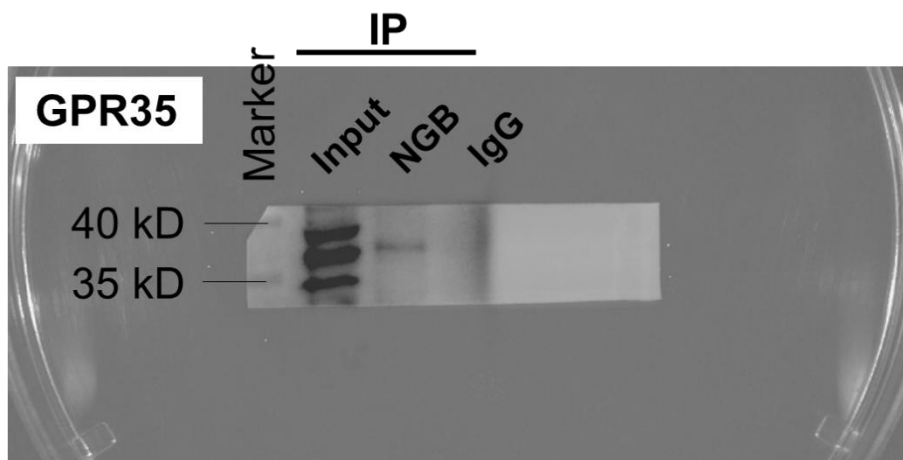

Figure 5D

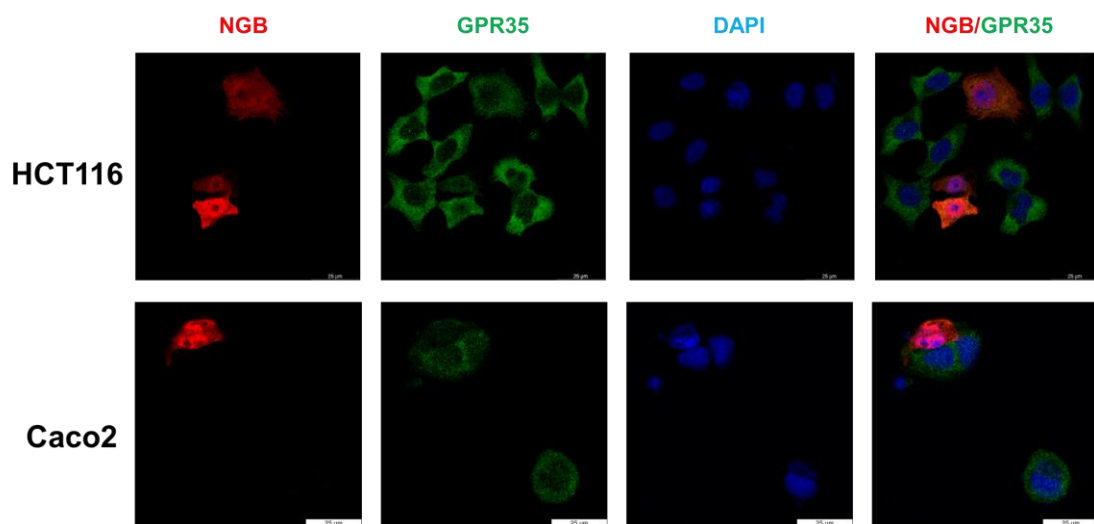

**Figure 5E WB**

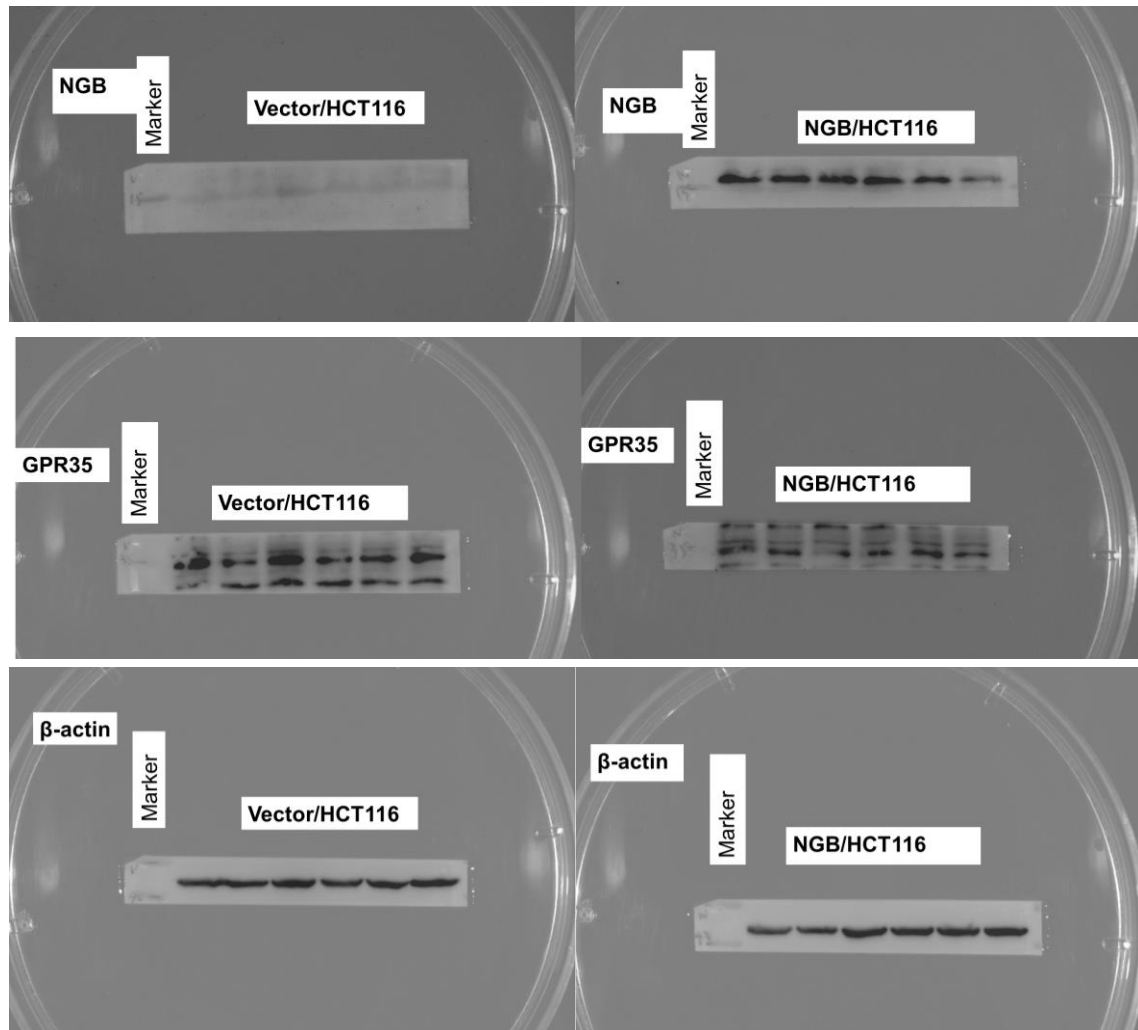

**Figure 6B WB**

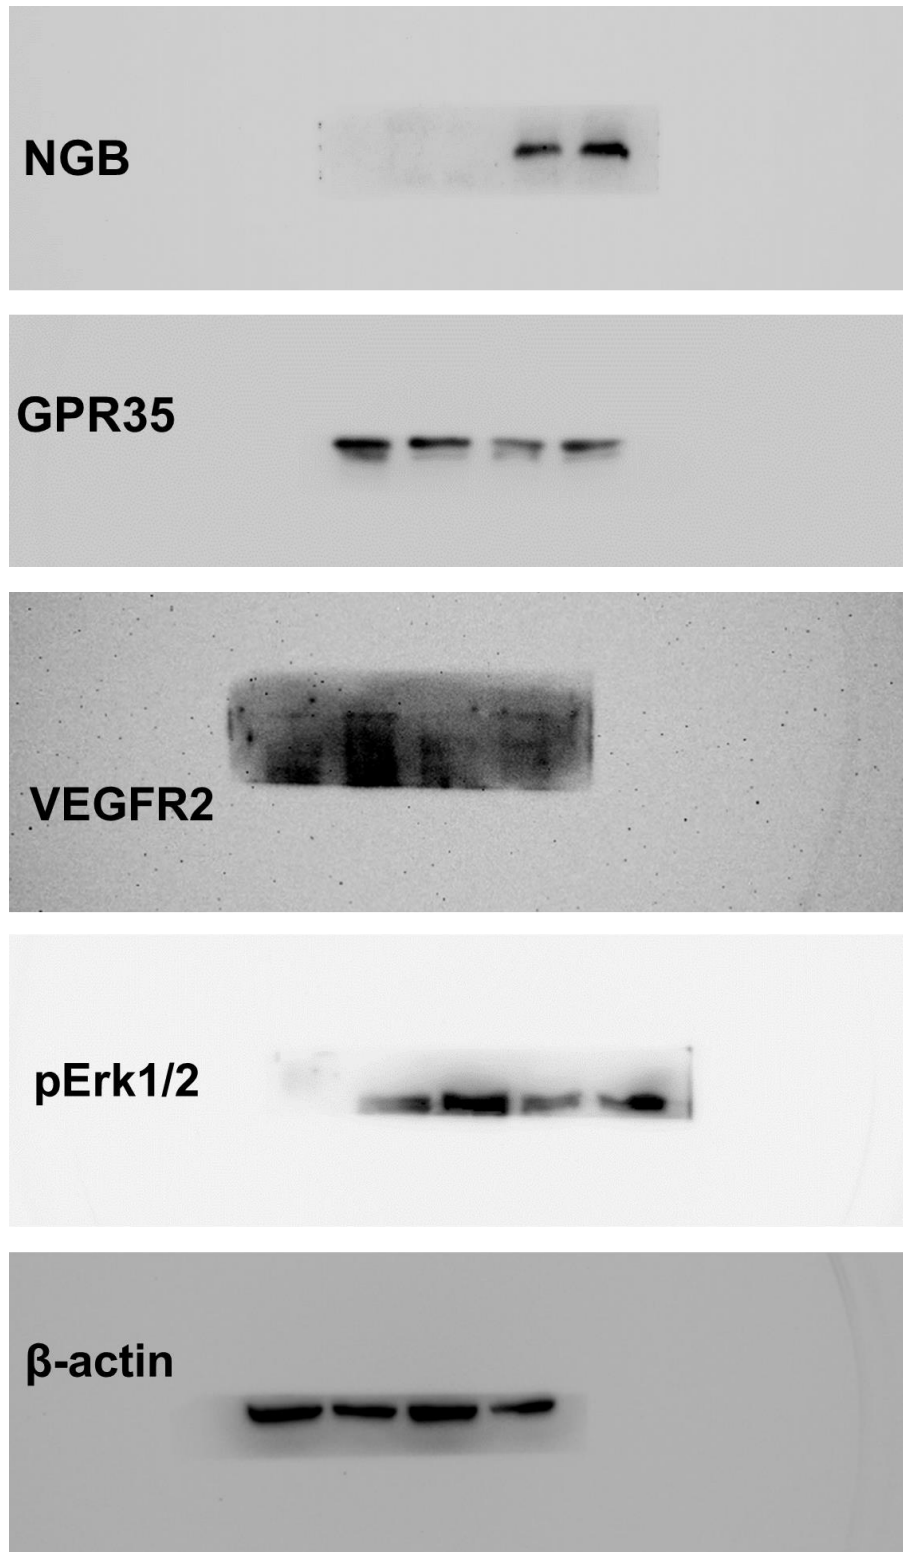

**Figure 6C**

**HCT116 conditional medium,**

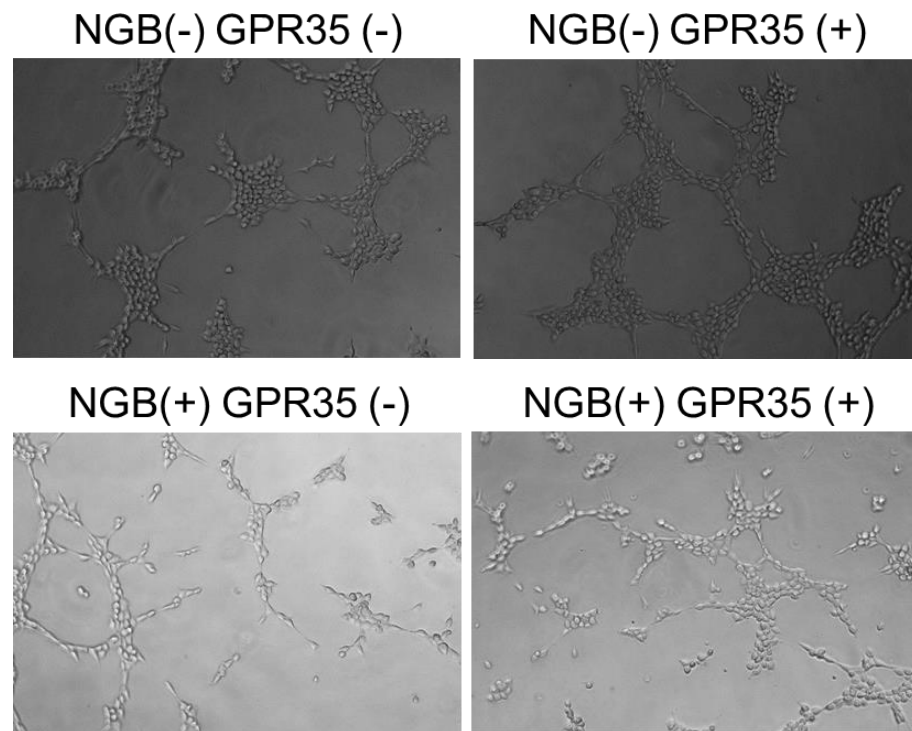

**Caco2 conditional medium**

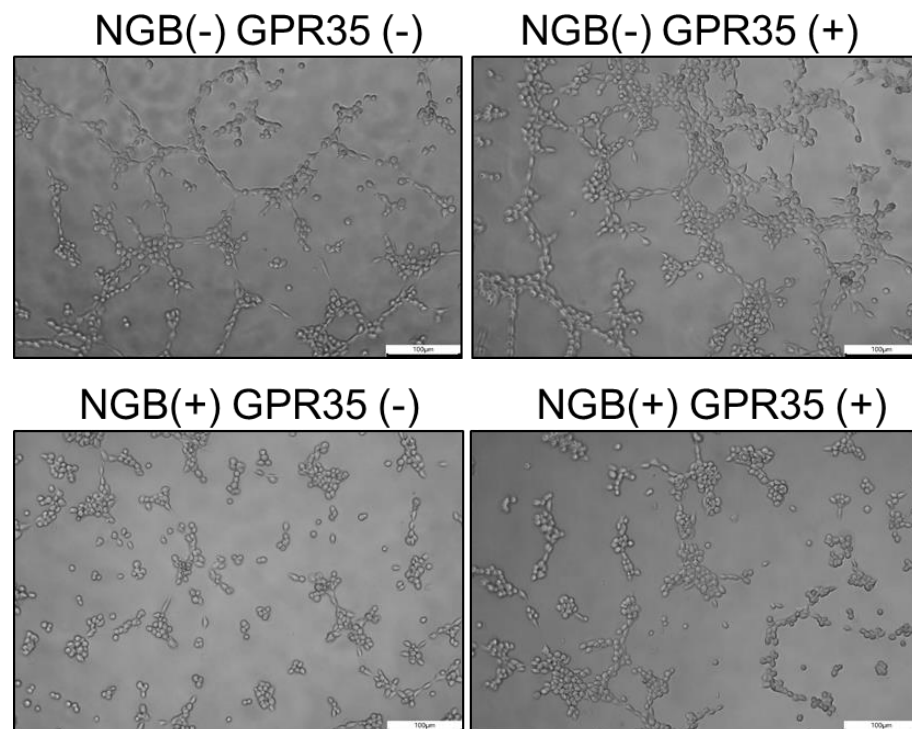

## Figure 6D

### HCT116-Invasion

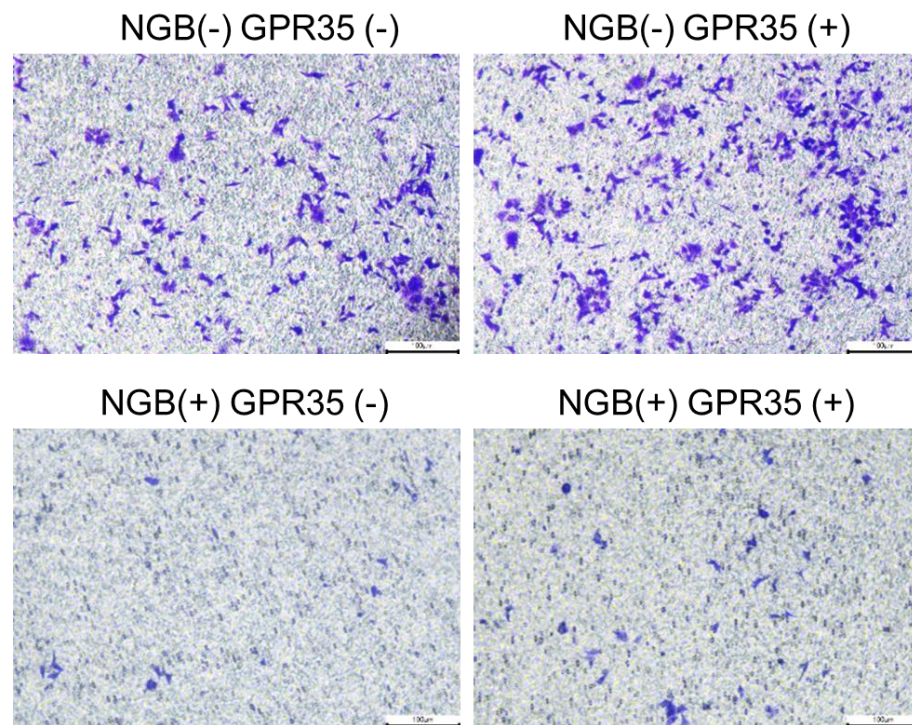

### HCT116-Migration

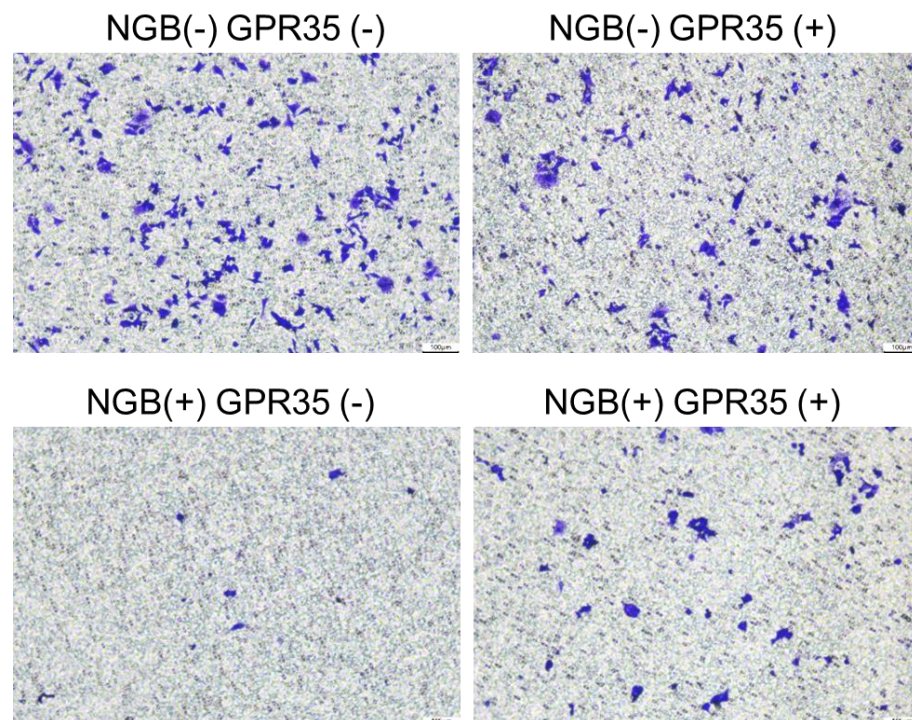



sFig 3D WB

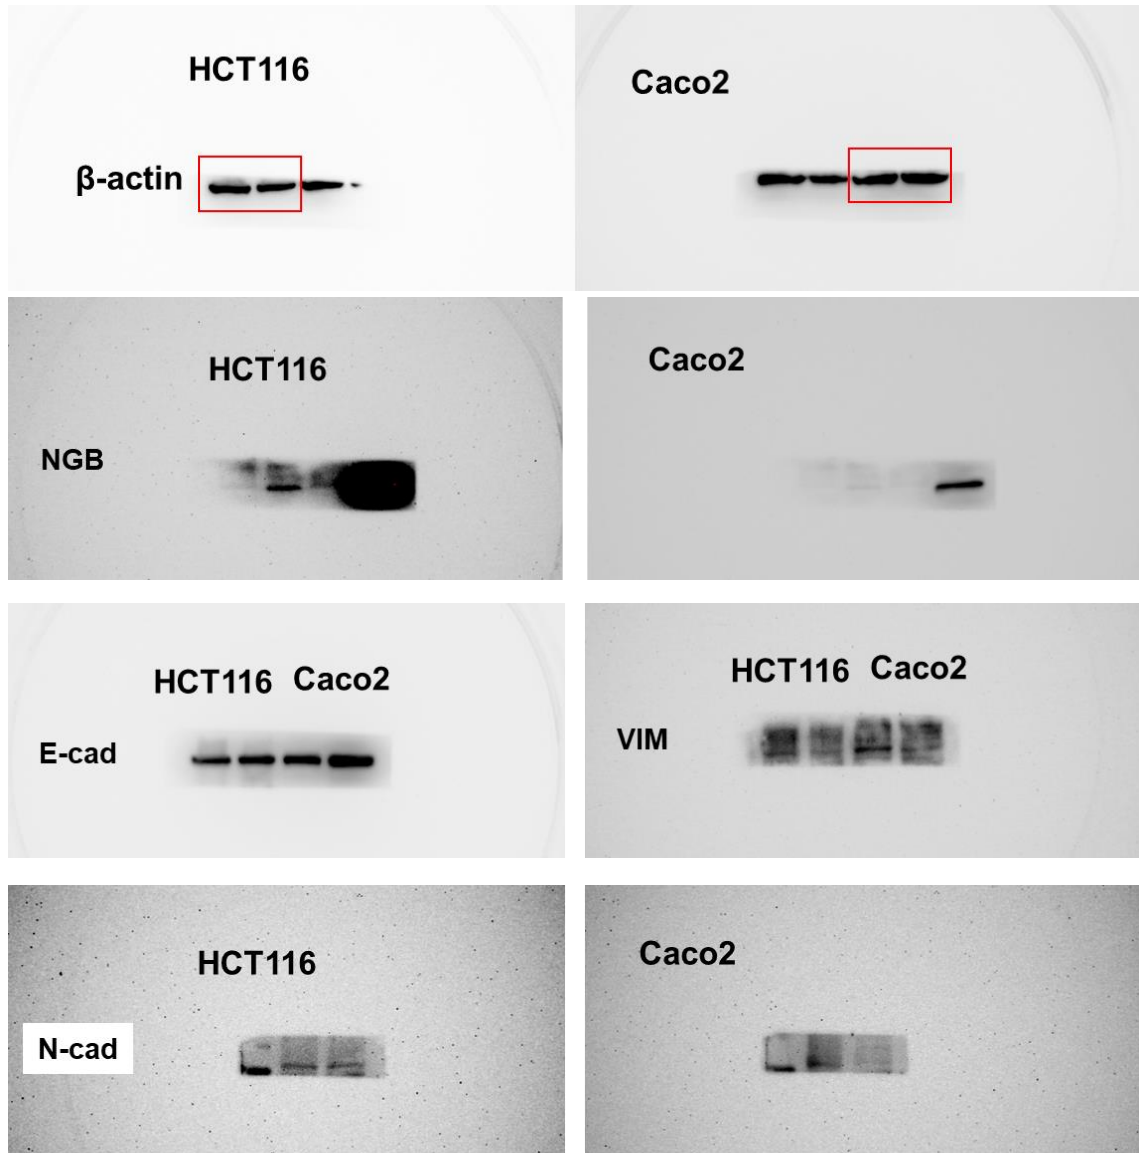

**sFigure 6B transwell**

**Upper: HCT116 conditional medium,**

**Bottom: Caco2 conditional medium**

**Vector**

**NGB**

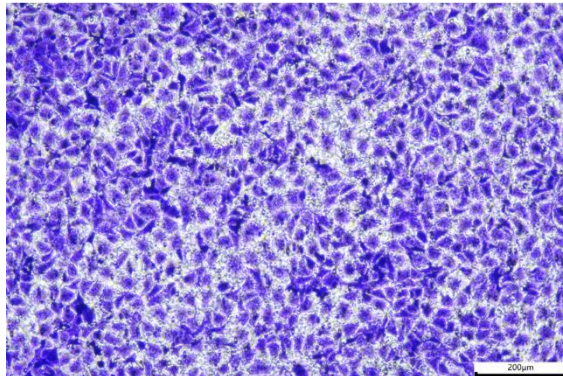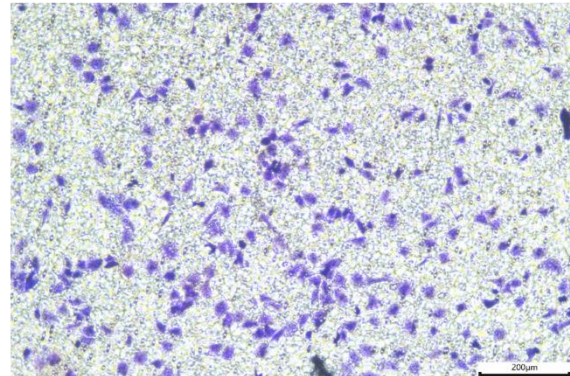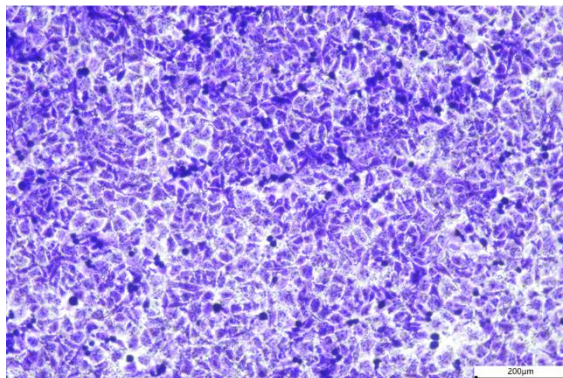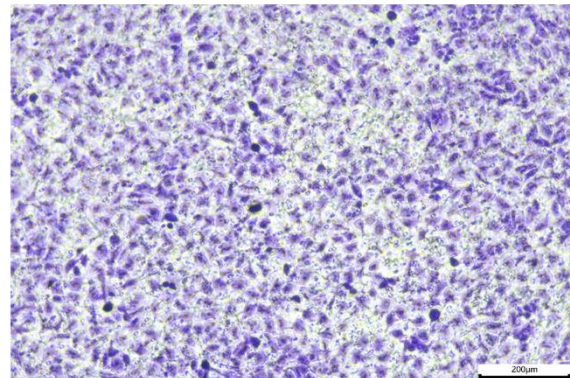

Supplement: 13148_2023_1472_MOESM3_ESM.pdf [file 13148_2023_1472_MOESM3_ESM.pdf]
